# Supplementary material for: Kinetics of the Direct DME Synthesis: State of the Art and Comprehensive Comparison of Semi-Mechanistic, Data-Based and Hybrid Modeling Approaches
Source: MDPI journal article supplement (doi:10.3390/catal12030347), 2022-03-18
Supplement: s1 [file Supplementary_Information.pdf › Supplementary_Information.pdf]

# Supplementary Materials: Kinetics of the direct DME synthesis: state of the art and comprehensive comparison of semi-mechanistic, data-based and hybrid modeling approaches

Nirvana Delgado Otalvaro<sup>1</sup> , Pembe Gül Bilir<sup>1</sup> , Karla Herrera Delgado<sup>1\*</sup> , Stephan Pitter<sup>1</sup>  and Jörg Sauer<sup>1</sup> 

## 1. Model specific parameters of the ANN-HM

The model specific parameters of the ANN-HMs discussed in the manuscript (ANN-HM with 5, 26 and 28 HNs) are given in this section. Specifically, these are the connection weights between the input and the hidden layer ( $W_{i,h}$ ) and between the hidden and the output layer ( $W_{h,o}$ ), as well as the biases of the hidden and outputs neurons ( $b_h$  and  $b_o$ ) as shown in Figure S1.

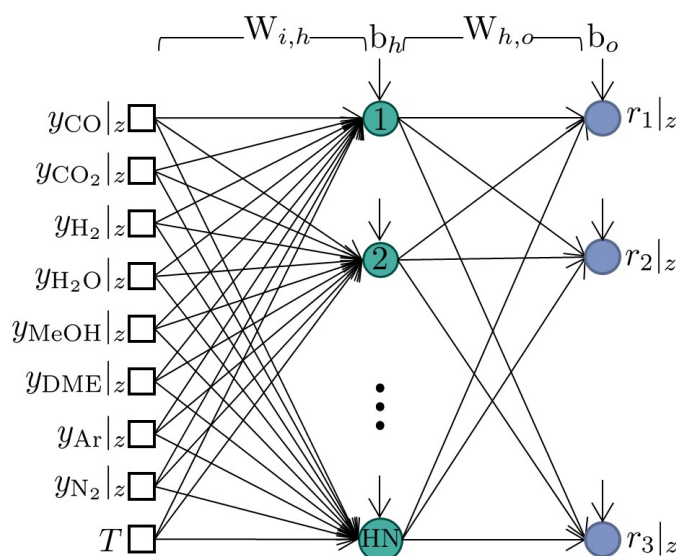

**Figure S1.** Schematic representation of the ANN-HM.

**Table 1:** Model specific parameters of the ANN-HM with 5 HNs. Connection weights of the input and hidden layer, biases of the hidden layer.

| $W_{i,h}$ |          |          |          |          |           |          |          |          |  | $b_h$     |
|-----------|----------|----------|----------|----------|-----------|----------|----------|----------|--|-----------|
| -0.60114  | 0.14025  | -0.63213 | 0.80736  | 0.08968  | -0.04125  | -0.27108 | 0.00641  | -0.43090 |  | 3.10519   |
| -1.14673  | 0.65526  | 1.31330  | 1.05803  | 0.01463  | -0.00635  | -0.26234 | 0.05774  | -0.44970 |  | 3.95600   |
| -3.02931  | -0.02462 | -3.53521 | 0.79813  | 0.04093  | 19.72959  | -3.39553 | -0.23304 | -1.22452 |  | 20.09301  |
| 3.98021   | -5.89989 | 0.18136  | -1.04395 | -0.77207 | -0.14084  | 0.37947  | 0.21915  | 0.88733  |  | -7.69831  |
| 2.60925   | 0.85926  | 2.62343  | 0.47530  | -1.60951 | -18.55797 | 3.14491  | 0.16885  | 1.05177  |  | -19.56385 |

**Table 2:** Model specific parameters of the ANN-HM with 5 HNs. Connection weights of the hidden and output layer, biases of the output layer.

| $W_{h,o}^{-1}$ |            |            | $b_o$   |
|----------------|------------|------------|---------|
| -14.986096     | -16.498396 | -14.484296 | 2.8317  |
| 4.86557018     | 5.96789325 | 4.68863279 | 10.1015 |
| 6.23236401     | -0.5675959 | -0.8749624 | 10.0811 |
| -11.948762     | -13.012473 | -11.014278 |         |
| 8.14194045     | 0.55032097 | -1.1746633 |         |

Table 3: Model specific parameters of the chosen ANN-HM with 26 HNs. Connection weights of the input and hidden layer, biases of the hidden layer.

| $W_{i,h}$ |          |          |          |          |          |          |          |          | $b_h$    |
|-----------|----------|----------|----------|----------|----------|----------|----------|----------|----------|
| 0.26106   | 0.12391  | 0.82471  | 0.33482  | -0.72017 | -0.16497 | -0.19633 | -0.32429 | 0.86960  | -0.36237 |
| 0.19960   | 0.28507  | -1.86320 | 0.22985  | -0.67681 | -1.02954 | 0.16398  | 0.11994  | 0.36954  | -1.43625 |
| -1.16703  | -1.23930 | 1.94422  | 0.56587  | 0.49974  | 0.16683  | 1.36101  | 0.10762  | 0.45637  | -1.66672 |
| 0.20960   | 0.84537  | 0.24244  | 0.16916  | 2.68825  | -2.82029 | 0.66726  | -0.00679 | 2.02909  | -4.48702 |
| 0.09335   | 0.43959  | -0.34136 | 0.30138  | -0.16581 | -0.58593 | -0.26262 | -0.07968 | -1.58115 | 0.47128  |
| 0.00205   | 0.06033  | -0.14307 | -0.04459 | 0.11140  | -0.40748 | 0.06257  | -0.22526 | 0.28571  | -0.02085 |
| 0.16260   | 0.45512  | 2.20344  | -0.94117 | -0.25011 | -0.46153 | 0.34534  | -0.03916 | 0.32684  | -2.61076 |
| -0.24824  | -0.39428 | 0.83872  | -0.18088 | 0.37006  | -0.00575 | 0.06836  | 0.20577  | -1.22799 | 1.04678  |
| 0.06642   | 0.20981  | 0.64012  | 0.33408  | -0.77574 | -1.37976 | 0.24136  | -0.16015 | 0.97653  | -1.36315 |
| -0.22450  | -0.46566 | -0.82017 | -0.21527 | 1.06934  | 0.04703  | -0.35663 | 0.05209  | -1.94161 | 3.53783  |
| 0.35660   | 0.70139  | -0.16036 | -0.35555 | 0.14775  | 0.37536  | 0.00984  | 0.08682  | 1.31660  | -2.49721 |
| -0.56388  | -0.14535 | 0.24360  | 0.31073  | -0.98601 | -0.13431 | 0.77766  | 0.02603  | 0.25057  | -1.83903 |
| -0.79324  | 1.26824  | 1.96136  | -1.87042 | 0.29754  | 0.27066  | 0.87333  | 0.10029  | 1.36528  | -2.69636 |
| 0.85912   | 1.50609  | -2.13724 | -0.40449 | -0.68632 | -0.33117 | -1.34989 | -0.21578 | -0.16249 | 2.31635  |
| 1.18093   | 0.13571  | -2.43287 | -0.26083 | 0.13894  | -0.98120 | -0.62123 | -0.01411 | 0.16473  | -0.56915 |
| 0.13604   | 0.99348  | -0.45484 | -0.78550 | -0.55885 | -1.27551 | 0.17066  | 0.31817  | 0.22216  | -1.61553 |
| 0.21975   | 0.25746  | -1.96152 | 0.22746  | -0.90822 | 0.80587  | -0.28249 | -0.00652 | -1.18703 | 0.06408  |
| 0.46520   | 0.10702  | 0.07642  | 0.22147  | 0.77300  | 0.61035  | -0.50695 | -0.01416 | 0.11848  | 0.16956  |
| 0.25148   | 0.94812  | -0.01635 | -0.31923 | -0.37376 | -0.26056 | -0.16762 | 0.11647  | -0.40989 | -1.07456 |
| 0.65769   | 0.69521  | -0.14171 | -0.00214 | 0.16558  | 0.92229  | -0.69206 | -0.32748 | -0.59464 | -0.22123 |
| 0.47396   | -0.10615 | 0.40137  | 0.06801  | 0.67045  | 0.12422  | -0.72975 | -0.20161 | -1.00531 | 2.23222  |
| 0.27067   | -0.45266 | -1.49560 | -0.23085 | 0.80500  | -0.47034 | 0.42334  | 0.07572  | 0.62688  | -2.28619 |
| -0.30719  | -0.34633 | 0.06663  | 1.04917  | 0.81328  | 0.10817  | 0.47108  | -0.04857 | 1.04581  | -1.57837 |
| 0.57060   | 0.64921  | -1.08245 | -0.15155 | -0.39120 | 0.14038  | -0.56275 | -0.03471 | -0.73006 | 0.16251  |
| 0.19670   | -0.23625 | -0.58807 | 0.57185  | -0.11151 | 0.01358  | -0.15972 | 0.04672  | 0.66813  | 0.32134  |
| 0.12129   | -0.23764 | -2.28032 | 1.35823  | -0.28722 | -0.20917 | -0.11084 | -0.00218 | -0.25148 | 0.02584  |

Table 4: Model specific parameters of the chosen ANN-HM with 26 HNs. Connection weights of the hidden and output layer, biases of the output layer.

|         | $\mathbf{W}_{h,o}^{-1}$ |         | $\mathbf{b}_o$ |
|---------|-------------------------|---------|----------------|
| 0.6009  | -0.1806                 | 0.2787  | -0.2325        |
| -1.5689 | 0.0367                  | 1.3037  | -0.8352        |
| 0.5055  | 1.0450                  | 1.8062  | -0.4410        |
| -0.2549 | 4.9671                  | 0.2776  |                |
| -0.9679 | 0.4391                  | 0.1689  |                |
| -0.5245 | -0.2991                 | -0.3791 |                |
| 1.4918  | -0.1403                 | 1.6442  |                |
| -0.5030 | -1.7649                 | -0.2364 |                |
| -0.4736 | -2.2558                 | -0.4178 |                |
| -1.6924 | 2.0570                  | 0.3809  |                |
| 2.9428  | 1.3525                  | 0.0294  |                |
| 0.7372  | 0.6209                  | -1.2581 |                |
| -2.6214 | -1.4086                 | 0.8564  |                |
| 0.2751  | 1.0030                  | 2.0603  |                |
| 1.5861  | 2.0752                  | 0.7404  |                |
| 2.0191  | 0.6807                  | -0.0775 |                |
| 0.3512  | -1.8184                 | -0.0947 |                |
| -0.0987 | 0.2139                  | 1.2012  |                |
| -2.3025 | -1.8966                 | -1.4302 |                |
| 0.4858  | 0.0648                  | -0.4688 |                |
| 1.6234  | 0.2751                  | -0.5682 |                |
| -1.1198 | -2.5540                 | -2.5515 |                |
| -1.5483 | -1.0474                 | -1.0012 |                |
| -1.1105 | -1.1005                 | -0.8157 |                |
| 0.1349  | -0.3539                 | -1.0865 |                |
| 1.1528  | -0.0161                 | -0.9238 |                |

Table 5: Model specific parameters of the ANN-HM with 28 HNs. Connection weights of the input and hidden layer, biases of the hidden layer.

| $W_{i,h}$ |          |          |          |          |          |          |          |          |          | $b_h$ |
|-----------|----------|----------|----------|----------|----------|----------|----------|----------|----------|-------|
| 0.46664   | 0.28557  | 0.43946  | -0.00902 | -0.16684 | 0.54786  | -0.43955 | 0.21328  | -0.19793 | -0.16975 |       |
| 0.60392   | 0.25781  | -0.59811 | -1.10325 | -0.45429 | 0.44810  | -0.66461 | -0.11598 | 0.98309  | 1.48690  |       |
| 0.07021   | -0.02014 | 0.00078  | 0.01422  | 0.72290  | -0.30191 | -0.02811 | 0.14087  | 0.04316  | -0.13027 |       |
| -0.65256  | -0.60885 | -0.01501 | -0.47318 | 0.50558  | -0.77336 | 0.62161  | 0.16996  | 0.63660  | 0.93549  |       |
| -0.19340  | 0.37544  | -1.33623 | 0.05289  | -0.24590 | 0.51843  | -0.46170 | -0.06380 | -1.95280 | 2.33584  |       |
| -0.12152  | -0.18302 | -1.03475 | 0.82643  | 0.44755  | 0.75689  | 0.47722  | -0.03124 | 1.65909  | -2.46539 |       |
| 0.04288   | 0.29545  | 0.68057  | -0.10564 | 0.35736  | -0.67963 | -0.00200 | -0.39468 | 0.95627  | -0.38664 |       |
| -0.56356  | 0.67832  | 2.15088  | -0.97097 | 2.05435  | -0.92779 | 0.52143  | 0.00043  | 1.51639  | -0.88890 |       |
| -0.57398  | -0.33225 | -0.48717 | 0.55994  | -0.00700 | 1.28148  | 0.26237  | -0.00604 | -0.04937 | 0.32635  |       |
| 0.48020   | -0.09632 | 1.15148  | 0.49759  | -0.08547 | 1.44197  | -0.99544 | -0.29592 | -0.29415 | 2.49784  |       |
| -0.49102  | -0.47841 | 0.52580  | -0.25073 | 0.55789  | -0.56585 | 0.53654  | 0.08371  | 0.09385  | -0.09893 |       |
| -0.18325  | -0.13461 | 0.47380  | -0.18808 | 0.43415  | -0.08744 | 0.13086  | 0.05678  | 0.17174  | 0.11998  |       |
| -0.06853  | 0.28728  | 0.73074  | -0.53532 | 0.24692  | -0.38353 | -0.01040 | -0.14186 | -0.69265 | 0.32885  |       |
| -0.24823  | -0.48929 | 0.60280  | -0.27136 | 1.18187  | -1.33482 | -0.17447 | -0.01340 | -1.50596 | 3.43600  |       |
| -0.75584  | -0.31503 | 1.63727  | 0.08533  | 1.34722  | -0.20588 | 0.42242  | -0.18111 | 0.90560  | 0.94341  |       |
| -1.28804  | -0.83502 | -1.31090 | -0.65176 | -0.91017 | -1.24448 | 1.05639  | 0.28885  | -0.59850 | 1.50718  |       |
| -0.44566  | -0.36471 | 1.78173  | -0.59253 | 0.53608  | 0.07252  | 0.27134  | -0.01676 | 0.84184  | 0.93740  |       |
| 0.73352   | -0.90533 | -1.51640 | 2.18375  | 0.16292  | -1.12499 | -0.88997 | -0.03892 | -1.02122 | 2.41060  |       |
| 1.49650   | 1.85872  | -2.08273 | -2.02300 | 0.28420  | -0.19405 | -2.46870 | -0.23513 | -0.77545 | 6.15865  |       |
| -0.44727  | -0.36909 | -0.31667 | -0.18004 | -0.21224 | 1.43467  | 0.19270  | -0.01945 | 0.35410  | 0.54217  |       |
| -0.17363  | -0.40172 | 0.07947  | 0.27894  | -0.19348 | -0.23665 | 0.17962  | 0.07693  | 0.10611  | 0.02526  |       |
| -0.07722  | 0.60267  | -1.06913 | -0.95967 | 0.15029  | -0.05226 | 0.62780  | 0.02814  | 0.57058  | -3.35825 |       |
| -0.86457  | 0.74219  | 3.77944  | -1.28672 | 0.87443  | -0.04660 | 0.54564  | 0.00464  | 0.77024  | -0.37002 |       |
| -0.57021  | -0.43266 | -1.12872 | 0.23752  | -0.51371 | -0.83880 | 0.80082  | 0.27356  | 0.13021  | -1.04363 |       |
| -0.22845  | 0.49498  | 1.06860  | -0.88429 | 0.87760  | 0.09871  | 0.36785  | -0.10285 | 1.83416  | -1.25260 |       |
| 0.09510   | -0.11401 | 0.15330  | 0.24541  | 0.33723  | -0.14926 | -0.07379 | 0.13185  | -0.16622 | 0.02456  |       |
| 0.49600   | 0.60806  | -1.44494 | -0.91344 | -0.63084 | -0.42098 | -0.15879 | 0.11993  | 0.01247  | -0.91623 |       |
| 0.25459   | -0.19486 | -0.00958 | 0.53563  | 0.49777  | -0.08896 | -0.23045 | -0.21662 | -0.94394 | 0.13169  |       |

Table 6: Model specific parameters of the ANN-HM with 28 HNs. Connection weights of the hidden and output layer, biases of the output layer.

| $\mathbf{W}_{h,o}^{-1}$ |          |          | $\mathbf{b}_o$ |
|-------------------------|----------|----------|----------------|
| 0.04726                 | -0.79667 | 0.43343  | 0.1063         |
| -1.19233                | -0.88727 | 0.03829  | -0.6298        |
| -0.69891                | -0.61537 | -0.24272 | -0.4188        |
| 1.02313                 | 1.75151  | 0.62214  |                |
| -1.01982                | -1.59516 | -0.84936 |                |
| -1.76369                | -1.66547 | -1.24119 |                |
| -0.25505                | -1.44239 | 0.32571  |                |
| -1.59085                | 2.50186  | 0.09647  |                |
| -0.49080                | 0.93114  | 1.42095  |                |
| 1.28131                 | 0.54790  | -0.37088 |                |
| 0.28152                 | -1.14893 | -0.84685 |                |
| 0.13544                 | -0.88629 | 0.25524  |                |
| -1.00940                | -0.10411 | 1.01269  |                |
| -3.10077                | 1.21421  | 0.07743  |                |
| 1.35216                 | 1.63563  | -0.66500 |                |
| -1.00380                | -1.34031 | 0.03127  |                |
| -0.13046                | 1.07453  | 1.51489  |                |
| 2.51110                 | 0.87342  | -2.01953 |                |
| 0.93582                 | 1.24484  | 2.61213  |                |
| -0.03322                | -1.04785 | -1.38058 |                |
| 0.18938                 | -0.40356 | -0.61202 |                |
| 0.13238                 | -1.13961 | -2.50424 |                |
| 0.15077                 | -3.01093 | -0.01719 |                |
| -0.51431                | -1.25468 | -0.09573 |                |
| 1.28006                 | -0.24813 | -0.14723 |                |
| -0.35293                | -0.46369 | -0.09210 |                |
| 2.32963                 | 1.98265  | -0.13629 |                |
| -0.50319                | -0.76767 | -0.46772 |                |

## 2. Supplementary figures

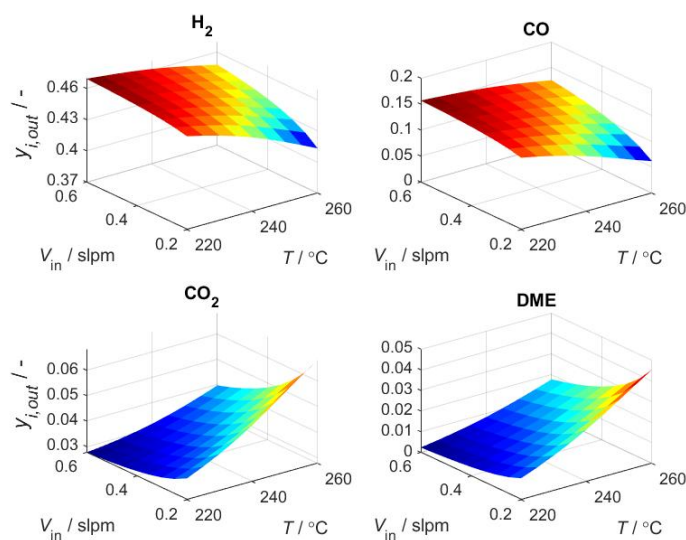

**Figure S2.** Surface response for the hybrid model predictions of the mole fractions of  $H_2$ ,  $CO$ ,  $CO_2$  and  $DME$  within the validity range of the temperature and total gas flow. Feed composition: 48.0 %  $H_2$ , 16.11 %  $CO$ , 2.88 %  $CO_2$ . Pressure 50 bar. CZA-to- $\gamma\text{-Al}_2\text{O}_3$ -ratio  $\mu = 1$ . ANN-HM with 26 HNs.

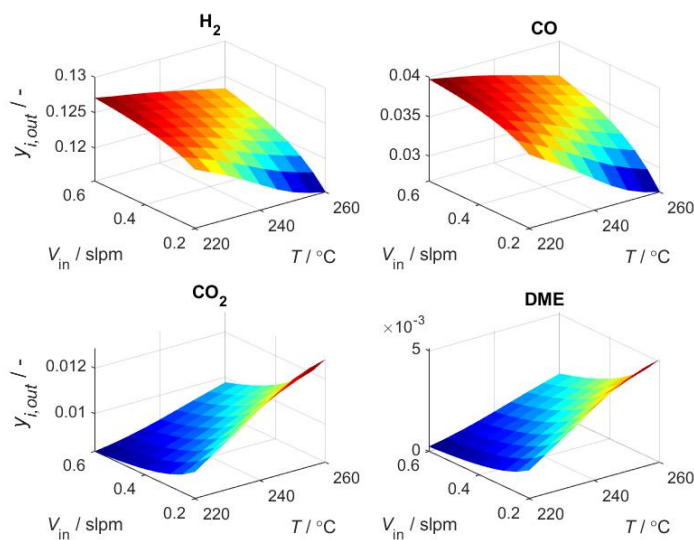

**Figure S3.** Surface response for the hybrid model predictions of the mole fractions of  $H_2$ ,  $CO$ ,  $CO_2$  and  $DME$  within the validity range of the temperature and total gas flow. Feed composition: 13.05 %  $H_2$ , 4.10 %  $CO$ , 0.86 %  $CO_2$ . Pressure 50 bar. CZA-to- $\gamma\text{-Al}_2\text{O}_3$ -ratio  $\mu = 1$ . ANN-HM with 26 HNs.

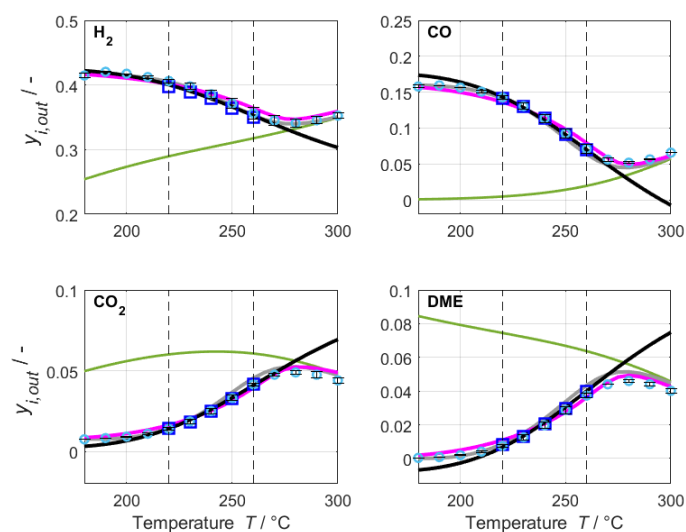

**Figure S4.** Range extrapolation of the temperature. Nominal feed composition: 42.3 %  $H_2$ , 16.1 %  $CO$ , 0.82 %  $CO_2$ . Total gas flow 0.2 slpm. Pressure 50 bar. CZA-to- $\gamma-Al_2O_3$ -ratio  $\mu = 1$ . ANN-HM with 5 HNs.

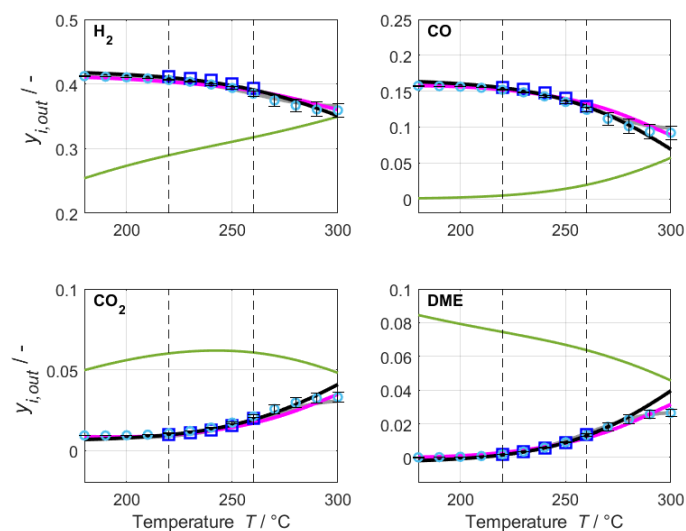

**Figure S5.** Range extrapolation of the temperature. Nominal feed composition: 42.3 %  $H_2$ , 16.1 %  $CO$ , 0.82 %  $CO_2$ . Total gas flow 0.6 slpm. Pressure 50 bar. CZA-to- $\gamma-Al_2O_3$ -ratio  $\mu = 1$ . ANN-HM with 5 HNs.

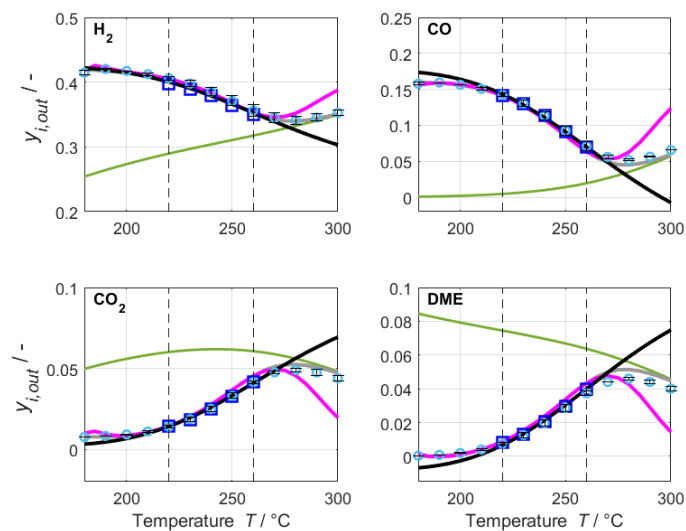

**Figure S6.** Range extrapolation of the temperature. Nominal feed composition: 42.3 %  $\text{H}_2$ , 16.1 %  $\text{CO}$ , 0.82 %  $\text{CO}_2$ . Total gas flow 0.2 slpm. Pressure 50 bar. CZA-to- $\gamma\text{-Al}_2\text{O}_3$ -ratio  $\mu = 1$ . ANN-HM with 28 HNs.

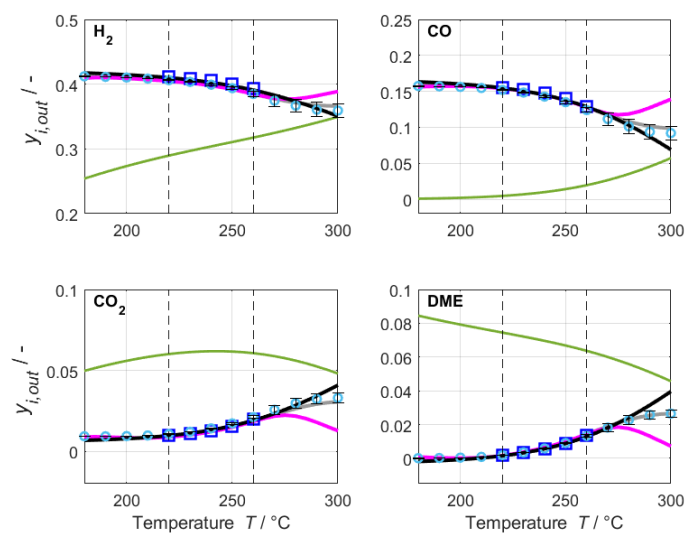

**Figure S7.** Range extrapolation of the temperature. Nominal feed composition: 42.3 %  $\text{H}_2$ , 16.1 %  $\text{CO}$ , 0.82 %  $\text{CO}_2$ . Total gas flow 0.6 slpm. Pressure 50 bar. CZA-to- $\gamma\text{-Al}_2\text{O}_3$ -ratio  $\mu = 1$ . ANN-HM with 28 HNs.



### 3. A priori criteria for the determination of mass and heat transport limitations

A priori criteria were employed for ruling out mass and heat transport limitations. These criteria were calculated for temperatures between 180-300 °C and total gas flows between 0.15-0.8 slpm. The values calculated for the worst case scenarios are give in Table 7 for each reaction, and show that mass and heat transport limitations do not play a significant role at the evaluated operating conditions.

Table 7: Calculated a priori criteria for determination of transport limitations.

| Phenomenon          | Equation [1]                                                                                  | Max. Calculated Value                                                                                                |
|---------------------|-----------------------------------------------------------------------------------------------|----------------------------------------------------------------------------------------------------------------------|
| Outer mass transfer | $\frac{r_{j,eff} n }{a'k_f c_b} < 0.05$                                                       | For reaction 1: $3.29 \cdot 10^{-5}$<br>For reaction 2: $2.09 \cdot 10^{-5}$<br>For reaction 3: $5.74 \cdot 10^{-5}$ |
| Outer heat transfer | $\frac{E_A}{RT_b} \left  \frac{-\Delta H_R}{hT_b} \right  \frac{r_{j,eff}}{a'} < 0.05$        | For reaction 1: $4.75 \cdot 10^{-4}$<br>For reaction 2: $3.09 \cdot 10^{-4}$<br>For reaction 3: $4.97 \cdot 10^{-4}$ |
| Inner mass transfer | $\frac{r_{j,eff} L^2 (n+1)}{D_{eff} c_s} < 0.15$                                              | For reaction 1: $4.62 \cdot 10^{-4}$<br>For reaction 2: $2.93 \cdot 10^{-4}$<br>For reaction 3: $8.06 \cdot 10^{-4}$ |
| Inner heat transfer | $\frac{E_A}{RT_b} \left  \frac{-\Delta H_R}{\lambda_{eff,p} T_b} \right  r_{j,eff} L^2 < 0.1$ | For reaction 1: $4.28 \cdot 10^{-5}$<br>For reaction 2: $2.78 \cdot 10^{-5}$<br>For reaction 3: $4.48 \cdot 10^{-5}$ |

### 4. Experimental values

The experimental values measured for validation of the simulation results at extrapolated conditions are given in Table 8.

### 5. Catalyst conditioning and deactivation

Figure S8 shows the CO<sub>x</sub>-conversion ( $X_{CO_x}$ ) as a function of the Time-On-Stream (ToS) for a reference operating point measured at 513 K, 50 bar and 7599.5 h<sup>-1</sup> and a feed of 38.2 % H<sub>2</sub>, 15.2 % CO, 1.0 % CO<sub>2</sub>, 45.7 % N<sub>2</sub>. Within the first 25 hours the reaction conditions were left constant at 513 K, 50 bar and 7599.5 h<sup>-1</sup>. After that, the conditions were varied dynamically between 453-573 K, 40-60 bar and 2849.8-15199.0 h<sup>-1</sup>. After 129 hours the experiments for model validation at 453-573 K, 40-60 bar as well as 2849.8-15199.0 h<sup>-1</sup> were taken. Between the ToS of 129 and 160 hours, where the experiments were conducted, the  $X_{CO_x}$  remains stable with a relative deviation of 10 % between the minimal and maximal measured  $X_{CO_x}$ .

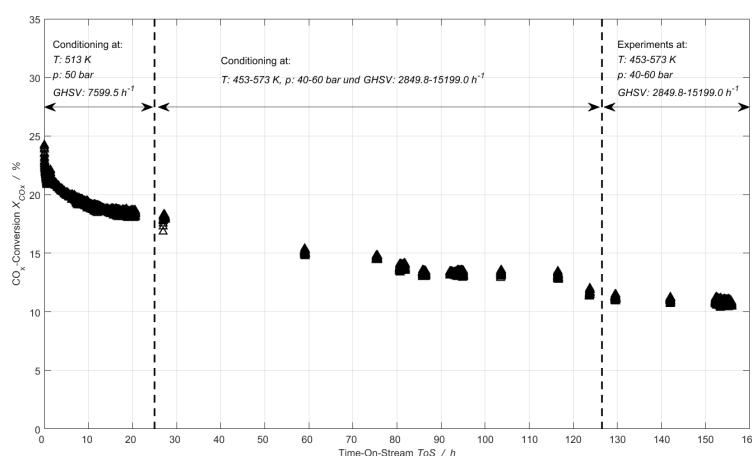

**Figure S8.** The CO<sub>x</sub>-conversion ( $X_{CO_x}$ ) as a function of the Time-On-Stream (ToS) for a reference operating point measured at 513 K, 50 bar and 7599.5 h<sup>-1</sup> and a feed of 38.2 % H<sub>2</sub>, 15.2 % CO, 1.0 % CO<sub>2</sub>, 45.7 % N<sub>2</sub>.

Table 8: Experimental values measured for validation of simulation results at extrapolated conditions. The catalyst bed consisted of 1.007g CZA, 0.9996 g  $\gamma$ -Al<sub>2</sub>O<sub>3</sub>, 9.98 g SiC, and it was 7.8 cm long.

| $y_{i,in}$          |         |                      | Conditions          |         |                        | $y_{i,out}$ |                     |         | Standard Deviation $y_{i,out}$ |                      |           |          |                     |                     |         |                       |                      |           |          |                     |      |
|---------------------|---------|----------------------|---------------------|---------|------------------------|-------------|---------------------|---------|--------------------------------|----------------------|-----------|----------|---------------------|---------------------|---------|-----------------------|----------------------|-----------|----------|---------------------|------|
| H <sub>2</sub><br>% | CO<br>% | CO <sub>2</sub><br>% | N <sub>2</sub><br>% | T<br>°C | $\dot{V}_{in}$<br>slpm | p<br>bar    | H <sub>2</sub><br>% | CO<br>% | H <sub>2</sub> O<br>%          | CO <sub>2</sub><br>% | MeOH<br>% | DME<br>% | N <sub>2</sub><br>% | H <sub>2</sub><br>% | CO<br>% | H <sub>2</sub> O<br>% | CO <sub>2</sub><br>% | MeOH<br>% | DME<br>% | N <sub>2</sub><br>% |      |
| 37.7                | 15.2    | 0.8                  | 46.2                | 180     | 0.20                   | 50          | 41.47               | 15.79   | 0.09                           | 0.75                 | 0.16      | 0.04     | 41.71               | 0.35                | 0.19    | 0.01                  | 0.01                 | 0.01      | 0.01     | 0.00                | 0.53 |
| 37.7                | 15.2    | 0.8                  | 46.2                | 190     | 0.20                   | 50          | 42.04               | 15.95   | 0.10                           | 0.83                 | 0.23      | 0.08     | 40.77               | 0.07                | 0.00    | 0.01                  | 0.02                 | 0.03      | 0.03     | 0.01                | 0.14 |
| 37.7                | 15.2    | 0.8                  | 46.2                | 200     | 0.20                   | 50          | 41.75               | 15.63   | 0.10                           | 0.92                 | 0.32      | 0.20     | 41.09               | 0.02                | 0.05    | 0.01                  | 0.03                 | 0.06      | 0.02     | 0.02                | 0.05 |
| 37.7                | 15.2    | 0.8                  | 46.2                | 210     | 0.20                   | 50          | 41.23               | 15.07   | 0.11                           | 1.10                 | 0.38      | 0.41     | 41.70               | 0.18                | 0.15    | 0.01                  | 0.04                 | 0.08      | 0.05     | 0.14                |      |
| 37.7                | 15.2    | 0.8                  | 46.2                | 220     | 0.20                   | 50          | 40.62               | 14.25   | 0.12                           | 1.40                 | 0.43      | 0.75     | 42.43               | 0.31                | 0.27    | 0.02                  | 0.08                 | 0.09      | 0.09     | 0.31                |      |
| 37.7                | 15.2    | 0.8                  | 46.2                | 230     | 0.20                   | 50          | 39.78               | 13.05   | 0.17                           | 1.86                 | 0.47      | 1.26     | 43.42               | 0.47                | 0.42    | 0.03                  | 0.12                 | 0.08      | 0.14     | 0.51                |      |
| 37.7                | 15.2    | 0.8                  | 46.2                | 240     | 0.20                   | 50          | 38.56               | 11.35   | 0.23                           | 2.50                 | 0.52      | 1.97     | 44.86               | 0.69                | 0.59    | 0.04                  | 0.16                 | 0.06      | 0.21     | 0.81                |      |
| 37.7                | 15.2    | 0.8                  | 46.2                | 250     | 0.20                   | 50          | 37.11               | 9.26    | 0.28                           | 3.30                 | 0.57      | 2.88     | 46.61               | 0.76                | 0.63    | 0.01                  | 0.17                 | 0.03      | 0.22     | 0.97                |      |
| 37.7                | 15.2    | 0.8                  | 46.2                | 260     | 0.20                   | 50          | 35.63               | 7.09    | 0.28                           | 4.15                 | 0.59      | 3.73     | 48.53               | 0.85                | 0.58    | 0.01                  | 0.10                 | 0.01      | 0.14     | 1.16                |      |
| 37.7                | 15.2    | 0.8                  | 46.2                | 270     | 0.20                   | 50          | 34.51               | 5.61    | 0.27                           | 4.75                 | 0.58      | 4.40     | 49.89               | 0.79                | 0.30    | 0.00                  | 0.07                 | 0.00      | 0.00     | 1.16                |      |
| 37.7                | 15.2    | 0.8                  | 46.2                | 280     | 0.20                   | 50          | 34.11               | 5.17    | 0.26                           | 4.89                 | 0.56      | 4.60     | 50.40               | 0.66                | 0.13    | 0.01                  | 0.14                 | 0.00      | 0.09     | 1.01                |      |
| 37.7                | 15.2    | 0.8                  | 46.2                | 290     | 0.20                   | 50          | 34.53               | 5.63    | 0.27                           | 4.75                 | 0.54      | 4.41     | 49.86               | 0.57                | 0.03    | 0.02                  | 0.17                 | 0.00      | 0.12     | 0.89                |      |
| 37.7                | 15.2    | 0.8                  | 46.2                | 300     | 0.20                   | 50          | 35.26               | 6.58    | 0.29                           | 4.40                 | 0.51      | 4.01     | 48.96               | 0.45                | 0.02    | 0.00                  | 0.17                 | 0.00      | 0.14     | 0.72                |      |
| 37.5                | 14.9    | 1.0                  | 46.7                | 180     | 0.60                   | 50          | 41.22               | 15.74   | 0.07                           | 0.93                 | 0.09      | 0.01     | 41.93               | 0.07                | 0.04    | 0.03                  | 0.00                 | 0.07      | 0.03     | 0.02                |      |
| 37.5                | 14.9    | 1.0                  | 46.7                | 190     | 0.60                   | 50          | 41.13               | 15.70   | 0.09                           | 0.93                 | 0.13      | 0.02     | 42.00               | 0.02                | 0.01    | 0.01                  | 0.00                 | 0.01      | 0.00     | 0.04                |      |
| 37.5                | 14.9    | 1.0                  | 46.7                | 200     | 0.60                   | 50          | 41.03               | 15.62   | 0.11                           | 0.94                 | 0.18      | 0.04     | 42.08               | 0.02                | 0.01    | 0.00                  | 0.00                 | 0.01      | 0.00     | 0.03                |      |
| 37.5                | 14.9    | 1.0                  | 46.7                | 210     | 0.60                   | 50          | 40.86               | 15.47   | 0.11                           | 0.98                 | 0.23      | 0.09     | 42.26               | 0.01                | 0.00    | 0.00                  | 0.00                 | 0.02      | 0.00     | 0.00                |      |
| 37.5                | 14.9    | 1.0                  | 46.7                | 220     | 0.60                   | 50          | 40.62               | 15.20   | 0.12                           | 1.07                 | 0.26      | 0.19     | 42.55               | 0.07                | 0.04    | 0.00                  | 0.01                 | 0.02      | 0.00     | 0.08                |      |
| 37.5                | 14.9    | 1.0                  | 46.7                | 230     | 0.60                   | 50          | 40.35               | 14.84   | 0.13                           | 1.20                 | 0.28      | 0.35     | 42.85               | 0.09                | 0.07    | 0.00                  | 0.02                 | 0.03      | 0.01     | 0.09                |      |
| 37.5                | 14.9    | 1.0                  | 46.7                | 240     | 0.60                   | 50          | 39.93               | 14.27   | 0.13                           | 1.42                 | 0.27      | 0.58     | 43.40               | 0.14                | 0.12    | 0.00                  | 0.03                 | 0.01      | 0.03     | 0.18                |      |
| 37.5                | 14.9    | 1.0                  | 46.7                | 250     | 0.60                   | 50          | 39.38               | 13.49   | 0.16                           | 1.72                 | 0.28      | 0.91     | 44.06               | 0.18                | 0.18    | 0.01                  | 0.06                 | 0.01      | 0.05     | 0.25                |      |
| 37.5                | 14.9    | 1.0                  | 46.7                | 260     | 0.60                   | 50          | 38.49               | 12.39   | 0.22                           | 2.11                 | 0.31      | 1.32     | 45.15               | 0.37                | 0.30    | 0.03                  | 0.08                 | 0.02      | 0.07     | 0.52                |      |
| 37.5                | 14.9    | 1.0                  | 46.7                | 270     | 0.60                   | 50          | 37.45               | 11.15   | 0.27                           | 2.57                 | 0.34      | 1.82     | 46.40               | 0.91                | 0.88    | 0.03                  | 0.29                 | 0.04      | 0.24     | 1.19                |      |
| 37.5                | 14.9    | 1.0                  | 46.7                | 280     | 0.60                   | 50          | 36.68               | 10.12   | 0.36                           | 2.97                 | 0.38      | 2.27     | 47.23               | 1.01                | 0.95    | 0.03                  | 0.30                 | 0.04      | 0.25     | 1.33                |      |
| 37.5                | 14.9    | 1.0                  | 46.7                | 290     | 0.60                   | 50          | 36.06               | 9.38    | 0.38                           | 3.23                 | 0.40      | 2.57     | 47.97               | 1.11                | 1.01    | 0.01                  | 0.31                 | 0.04      | 0.26     | 1.51                |      |
| 37.5                | 14.9    | 1.0                  | 46.7                | 300     | 0.60                   | 50          | 35.92               | 9.20    | 0.39                           | 3.30                 | 0.40      | 2.65     | 48.14               | 1.10                | 0.98    | 0.01                  | 0.29                 | 0.04      | 0.23     | 1.51                |      |
| 38.2                | 15.2    | 1.0                  | 45.7                | 260     | 0.40                   | 40          | 38.04               | 12.07   | 0.23                           | 2.15                 | 0.25      | 1.54     | 44.33               | 0.53                | 0.56    | 0.03                  | 0.20                 | 0.05      | 0.06     | 1.79                |      |
| 38.2                | 15.2    | 1.0                  | 45.7                | 260     | 0.40                   | 45          | 37.38               | 11.41   | 0.24                           | 2.33                 | 0.31      | 1.79     | 45.00               | 0.35                | 0.46    | 0.02                  | 0.19                 | 0.06      | 0.02     | 1.64                |      |
| 38.2                | 15.2    | 1.0                  | 45.7                | 260     | 0.40                   | 50          | 36.72               | 10.70   | 0.29                           | 2.55                 | 0.39      | 2.07     | 45.65               | 0.49                | 0.68    | 0.01                  | 0.29                 | 0.09      | 0.12     | 1.81                |      |
| 38.2                | 15.2    | 1.0                  | 45.7                | 260     | 0.40                   | 55          | 36.07               | 10.06   | 0.31                           | 2.73                 | 0.47      | 2.32     | 46.25               | 0.39                | 0.73    | 0.03                  | 0.36                 | 0.14      | 0.17     | 1.71                |      |
| 38.2                | 15.2    | 1.0                  | 45.7                | 260     | 0.40                   | 60          | 35.31               | 9.35    | 0.29                           | 2.92                 | 0.55      | 2.59     | 46.78               | 0.27                | 0.74    | 0.01                  | 0.40                 | 0.15      | 0.17     | 1.82                |      |

---

## References

1. Pérez-Ramírez, J.; Berger, R.J.; Mul, G.; Kapteijn, F.; Moulijn, J.A. Six-flow reactor technology a review on fast catalyst screening and kinetic studies. *Catalysis Today* **2000**, *60*, 93–109. doi:10.1016/S0920-5861(00)00321-7.
